# Supplementary material for: Gut microbiome and metabolome in a non-human primate model of chronic excessive alcohol drinking
Source: PubMed Central journal article supplement (PMC8636625; doi:10.1038/s41398-021-01728-6), 2021-12-01

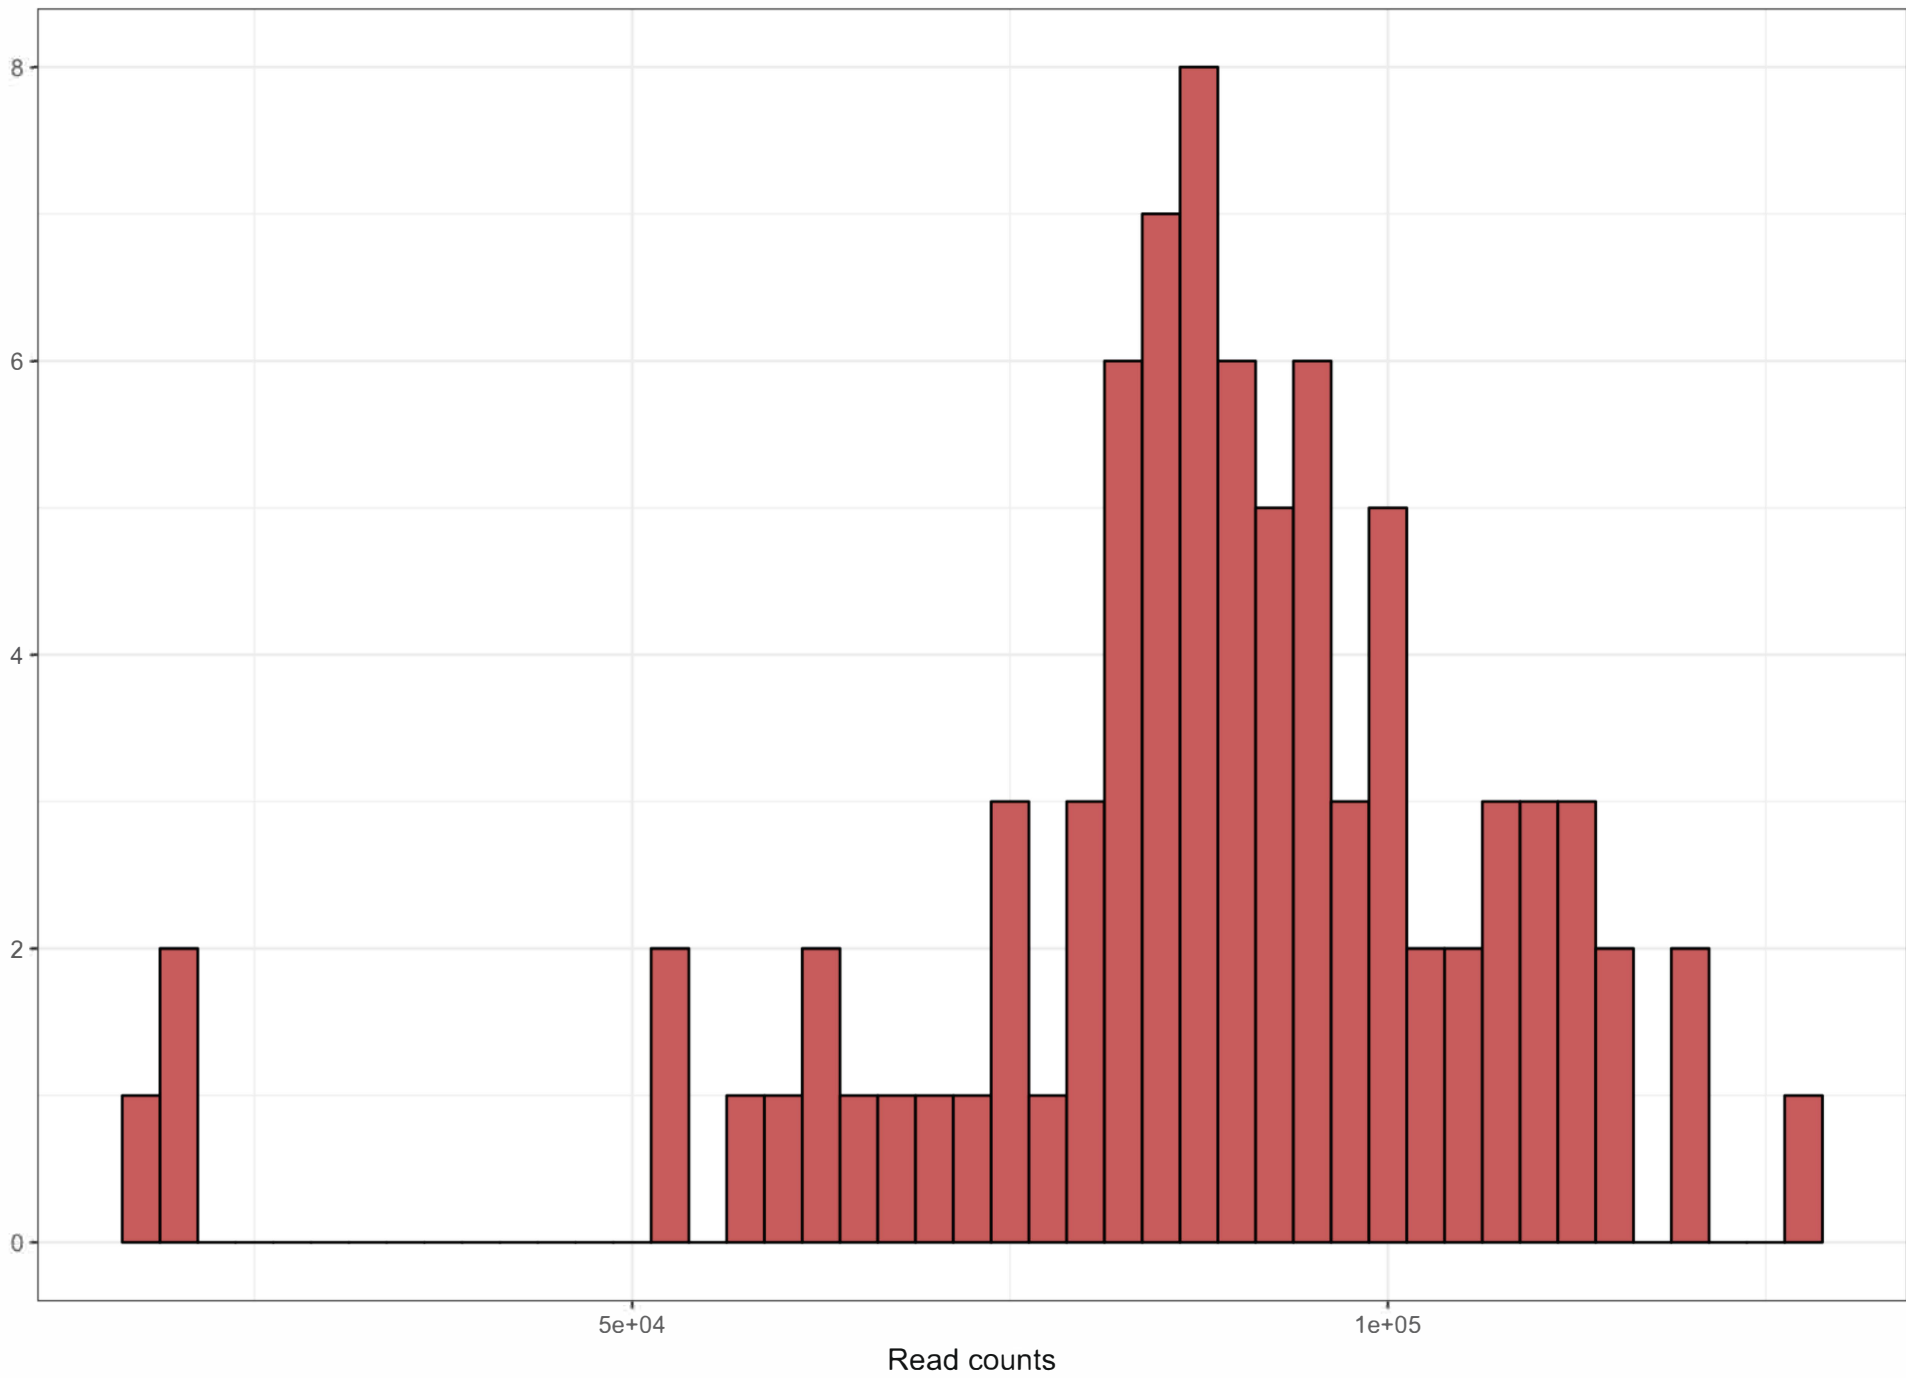

Supplement: 41398_2021_1728_MOESM2_ESM.pdf [file 41398_2021_1728_MOESM2_ESM.pdf]
